# Supplementary material for: Assembly line synthesis of isoprene from formaldehyde and isobutene over SiO2-supported MoP catalysts with active deposited carbon
Source: Royal Society of Chemistry journal article supplement (doi:10.1039/c7ra05078j), 2017-01-01
Supplement: c7ra05078j1.pdf [file c7ra05078j1.pdf]

## “Assembly line” for Synthesis of Isoprene from Formaldehyde and Isobutene over SiO<sub>2</sub> Supported MoP Catalysts with Active Deposited Carbon

**Table S1** elements content on catalysts surface by XPS

| Catalysts | C     | P     | Mo   |
|-----------|-------|-------|------|
| MoP C     | 32.89 | 10.57 | 1.88 |
| MoP C-10  | 47.88 | 2.4   | 1.34 |
| MoP C-20  | 44.56 | 3.4   | 1.68 |
| MoP C-40  | 42.8  | 10.54 | 2.29 |
| MoP C-100 | 46.56 | 9.12  | 1.47 |
| MoP C-240 | 49.27 | 3.01  | 1.49 |

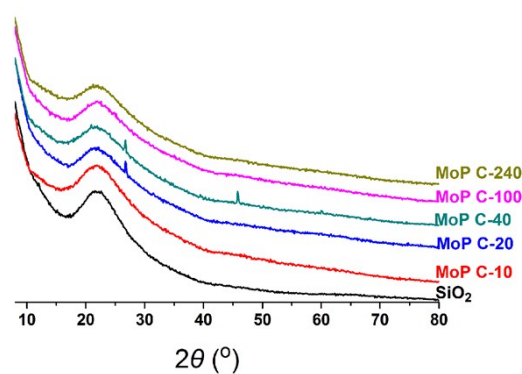

**Fig. S1** XRD pattern of MoP C-y catalysts

**Table S2** Ratio of peak 1 and peak 2 from NH<sub>3</sub>-TPD curves

| Catalysts                          | Peak 2/Peak 1 |
|------------------------------------|---------------|
| MoP C                              | -             |
| MoP C-10                           | 0.09          |
| MoP C-20                           | 0.34          |
| MoP C-40                           | 0.79          |
| MoP C-100                          | 2.05          |
| MoP C-240                          | 3.32          |
| MoO <sub>3</sub> -10               | 0.08          |
| MoO <sub>3</sub> -40               | 0.72          |
| H <sub>3</sub> PO <sub>4</sub> -10 | 0.73          |
| H <sub>3</sub> PO <sub>4</sub> -40 | 2.58          |
| MoP A-10                           | 0.05          |
| MoP B-10                           | 0.07          |
| MoP C-10                           | 0.09          |
| MoP D-10                           | 0.12          |

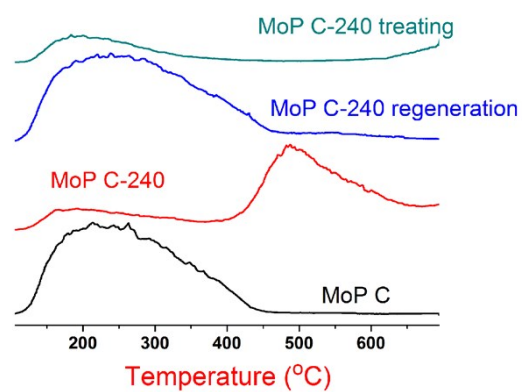

**Fig. S2** TPD curves of MoP C catalysts: MoP C, MoP C-240 and MoP C-240 regeneration was treated at 400°C under He, and MoP C-240 treating was treated at 530°C to remove mainly coke under He

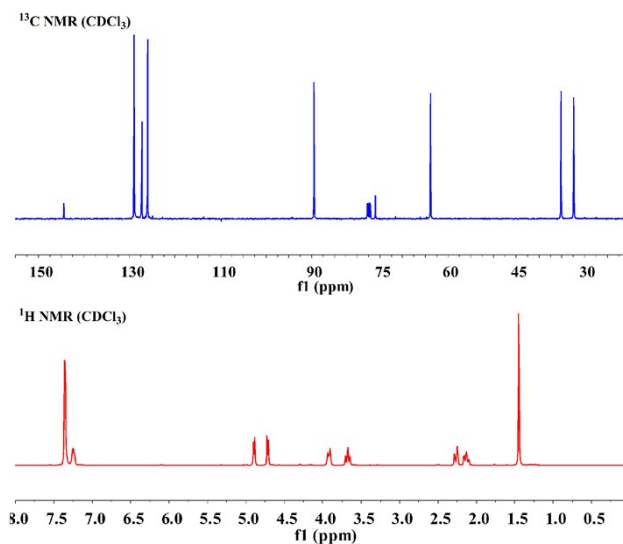

**Fig. S3** NMR of MPD

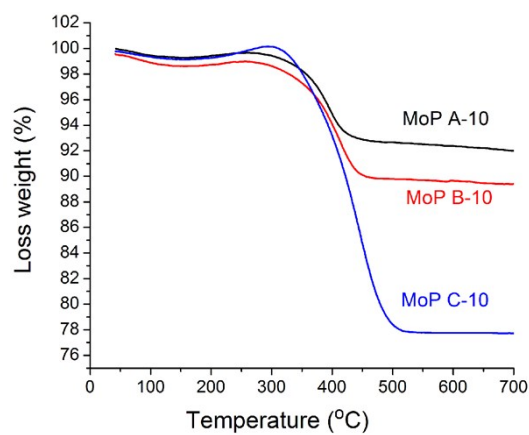

**Fig. S4** TG MoP X-10
